# Supplementary material for: TosR-Mediated Regulation of Adhesins and Biofilm Formation in Uropathogenic Escherichia coli
Source: PubMed Central journal article supplement (PMC5956150; doi:10.1128/msphere.00222-18), 2018-05-16
Supplement: sph003182550sf1.pdf [file sph003182550sf1.pdf]

Fig. S1

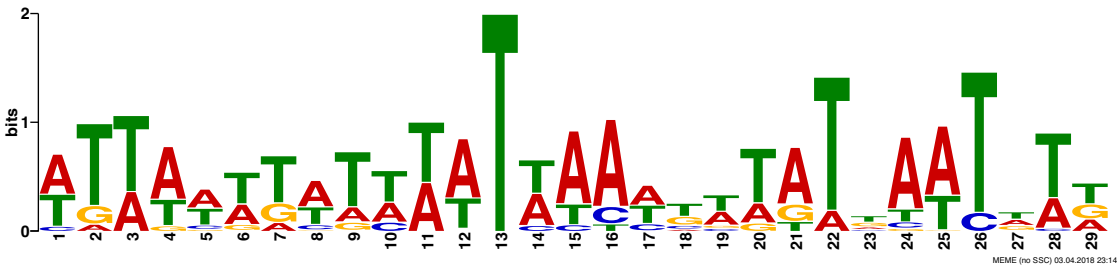

**Consensus Sequence:**  
WTWWWWTWTWWWWTWAAWKWTATKAWTDTD
