# Supplementary material for: TosR-Mediated Regulation of Adhesins and Biofilm Formation in Uropathogenic Escherichia coli
Source: PubMed Central journal article supplement (PMC5956150; doi:10.1128/msphere.00222-18), 2018-05-16

Fig. S5

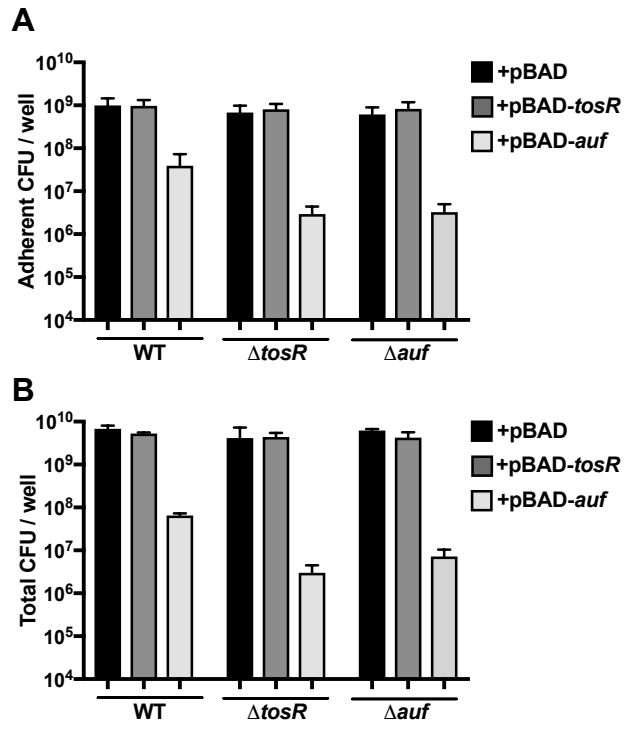

Supplement: sph003182550sf5.pdf [file sph003182550sf5.pdf]
