# Supplementary material for: TosR-Mediated Regulation of Adhesins and Biofilm Formation in Uropathogenic Escherichia coli
Source: PubMed Central journal article supplement (PMC5956150; doi:10.1128/msphere.00222-18), 2018-05-16
Supplement: sph003182550st1.pdf [file sph003182550st1.pdf]

**Table S1**

| <b>Genomic island<sup>a</sup></b> | <b>%G+C</b> | <b>Size (kb) of genomic island</b> | <b>No. of genes<sup>b</sup></b> |
|-----------------------------------|-------------|------------------------------------|---------------------------------|
| PAI- <i>asnT</i>                  | 57          | 32                                 | 0                               |
| PAI- <i>metV</i>                  | 53          | 32                                 | 0                               |
| GI- <i>asnW</i>                   | 53          | 54                                 | 1                               |
| $\phi$ - <i>potB</i>              | 51          | 44                                 | 1                               |
| PAI- <i>icdA</i>                  | 50          | 54                                 | 0                               |
| GI- <i>cobU</i>                   | 50          | 44                                 | 2                               |
| $\phi$ -b0847                     | 50          | 33                                 | 0                               |
| PAI- <i>serX</i>                  | 49          | 113                                | 23                              |
| $\phi$ - <i>smpB</i>              | 49          | 48                                 | 4                               |
| PAI- <i>pheU</i>                  | 48          | 52                                 | 9                               |
| PAI- <i>aspV</i>                  | 47          | 100                                | 12                              |
| PAI- <i>pheV</i>                  | 47          | 123                                | 16                              |
| GI- <i>selC</i>                   | 47          | 68                                 | 0                               |

<sup>a</sup>PAI, pathogenicity island - contains known virulence genes; GI, genomic island - contains genes with unconfirmed or no roles in virulence;  $\phi$ , contains phage-rich DNA sequences.

<sup>b</sup>Genes identified by RNA-Seq to be differentially regulated following induction of *tosR*.
