# Supplementary material for: TosR-Mediated Regulation of Adhesins and Biofilm Formation in Uropathogenic Escherichia coli
Source: PubMed Central journal article supplement (PMC5956150; doi:10.1128/msphere.00222-18), 2018-05-16
Supplement: sph003182550st2.pdf [file sph003182550st2.pdf]

Table S2

Putative TosR binding motif: WTWWWTWTWWWTWAAWKWTATKAWTDTD

| Top 25 genes upregulated in response to <i>tosR</i> overexpression   |              |                                         |                    |                      |
|----------------------------------------------------------------------|--------------|-----------------------------------------|--------------------|----------------------|
| Gene locus                                                           | Gene name    | Putative DNA binding sequence (5' → 3') | Start <sup>a</sup> | P value <sup>b</sup> |
| c0359                                                                | <i>tosR</i>  | AACAATAATATCTATAATATAGATATTAT           | 254                | 1.32E-07             |
| c4594                                                                | c4594        | ATATATTTTATATTTATAGTTTGATTGTT           | 181                | 2.40E-06             |
| c0092                                                                | c0092        | ATTATTGATCAATTAATGTTAAGAATTAA           | 117                | 1.42E-08             |
| c4208                                                                | <i>aufF</i>  | TTAATATATACCATTAATATATATTAAT            | 3985               | 2.43E-07             |
| c4924                                                                | c4924        | CTTATAAAACAAATATATAAATATTTTAT           | 78                 | 1.23E-06             |
| c4212                                                                | <i>aufC</i>  | TTAATATATACCATTAATATATATTAAT            | 1954               | 2.43E-07             |
| c4210                                                                | <i>aufD</i>  | TTAATATATACCATTAATATATATTAAT            | 4659               | 2.43E-07             |
| c4213                                                                | <i>aufB</i>  | TTAATATATACCATTAATATATATTAAT            | 1138               | 2.43E-07             |
| c4214                                                                | <i>aufA</i>  | TTAATATATACCATTAATATATATTAAT            | 360                | 2.43E-07             |
| c3791                                                                | <i>yqiL</i>  | ATTACTAATTAATAATATAAATTAATAAG           | 342                | 4.81E-07             |
| c2884                                                                | <i>yfcV</i>  | TATATTTATTGATTTAATTAATTAAT              | 365                | 3.46E-08             |
| c4423                                                                | c4423        | ATAATTAATTATTTAAATTTTCAATCAG            | 299                | 7.40E-07             |
| c3724                                                                | <i>pitB</i>  | - <sup>c</sup>                          | -                  | -                    |
| c4209                                                                | <i>aufE</i>  | TTAATATATACCATTAATATATATTAAT            | 5077               | 2.43E-07             |
| c4589                                                                | <i>yicP</i>  | -                                       | -                  | -                    |
| c0325                                                                | c0325        | TTTTTTTCTTAATATCATTAAATAAATTTA          | 97                 | 4.31E-07             |
| c0360                                                                | <i>tosC</i>  | AACAATAATATCTATAATATAGATATTAT           | 254                | 1.32E-07             |
| c0322                                                                | <i>efuD</i>  | CATATTGATATAGTTAACTAATTATCTAT           | 288                | 3.14E-06             |
| c5444                                                                | <i>yjjQ</i>  | ATTATTTAATTATAAATTAATGAATGAG            | 258                | 1.52E-09             |
| c0323                                                                | <i>efuE</i>  | CATATTGATATAGTTAACTAATTATCTAT           | 1732               | 3.14E-06             |
| c2408                                                                | c2408        | TGTTAGTTATTTTAAAAAATATAAACTTT           | 71                 | 6.17E-06             |
| c3178                                                                | c3178        | CAGAATGACACGTTTTATTAATAAATAAA           | 42                 | 1.17E-07             |
| c1936                                                                | c1936        | -                                       | -                  | -                    |
| c0435                                                                | c0435        | -                                       | -                  | -                    |
| c4894                                                                | <i>tsx</i>   | -                                       | -                  | -                    |
| Top 25 genes downregulated in response to <i>tosR</i> overexpression |              |                                         |                    |                      |
| Gene locus                                                           | Gene name    | Putative DNA binding sequence (5' → 3') | Start              | P value              |
| c1684                                                                | <i>narK</i>  | TTAAATGAGCAATAACCTTAATGAATGTG           | 282                | 2.16E-07             |
| c2330                                                                | <i>sdiA</i>  | ATAAATTATATATAAATCTTATTTATGTG           | 56                 | 2.21E-09             |
| c3655                                                                | c3655        | -                                       | -                  | -                    |
| c1682                                                                | <i>narX</i>  | CACATTCATTAAGGTTATTGCTCATTTAA           | 21                 | 2.16E-07             |
| c5187                                                                | <i>papH2</i> | -                                       | -                  | -                    |
| c3998                                                                | <i>yhcS</i>  | TGTAGATTGATATTTAATATATTAACGTA           | 58                 | 4.44E-06             |

|                 |              |                               |      |          |
|-----------------|--------------|-------------------------------|------|----------|
| c1241           | <i>focC</i>  | CATGTTTACAACATAAAAAACTAAATATA | 1971 | 4.07E-06 |
| c2998           | <i>yffB</i>  | TTTAATGTTATTTAATAGTTGTTAATTTG | 100  | 3.00E-08 |
| c1240           | <i>sfaD</i>  | CATGTTTACAACATAAAAAACTAAATATA | 1406 | 4.07E-06 |
| NA <sup>d</sup> | <i>papB</i>  | AATATTTACAACATAAAAAACTAAATTTA | 67   | 1.81E-06 |
| NA              | <i>papB2</i> | -                             | -    | -        |
| c2701           | <i>yeiC</i>  | -                             | -    | -        |
| c5180           | <i>papF2</i> | -                             | -    | -        |
| c5188           | <i>papA2</i> | -                             | -    | -        |
| c3733           | <i>hybA</i>  | -                             | -    | -        |
| c3591           | <i>papH</i>  | AATATTTACAACATAAAAAACTAAATTTA | 1224 | 1.81E-06 |
| c1244           | <i>focG</i>  | CATGTTTACAACATAAAAAACTAAATATA | 5928 | 4.07E-06 |
| c5333           | <i>pmbA</i>  | -                             | -    | -        |
| c1245           | <i>focH</i>  | CATGTTTACAACATAAAAAACTAAATATA | 6382 | 4.07E-06 |
| c1246           | c1246        | CATGTTTACAACATAAAAAACTAAATATA | 7696 | 4.07E-06 |
| c2158           | <i>ynjE</i>  | -                             | -    | -        |
| c1243           | <i>focF</i>  | CATGTTTACAACATAAAAAACTAAATATA | 5379 | 4.07E-06 |
| c1681           | <i>narL</i>  | CACATTCATTAAGGTTATTGCTCATTTAA | 1744 | 2.16E-07 |
| c3584           | <i>papF</i>  | AATATTTACAACATAAAAAACTAAATTTA | 6942 | 1.81E-06 |
| c1239           | <i>focA</i>  | CATGTTTACAACATAAAAAACTAAATATA | 778  | 4.07E-06 |

<sup>a</sup>No. of bp upstream of ATG of the listed gene.

<sup>b</sup>Site *P* value as determined by Multiple Em for Motif Elicitation (MEME).

<sup>c</sup>-, no consensus sequence identified.

<sup>d</sup>NA, not annotated.
