# Supplementary material for: TosR-Mediated Regulation of Adhesins and Biofilm Formation in Uropathogenic Escherichia coli
Source: PubMed Central journal article supplement (PMC5956150; doi:10.1128/msphere.00222-18), 2018-05-16
Supplement: sph003182550st3.pdf [file sph003182550st3.pdf]

**Table S3**

| <b>Strain</b>                       | <b>Genotype/resistance/use<sup>a</sup></b>                                           | <b>Source</b>    |
|-------------------------------------|--------------------------------------------------------------------------------------|------------------|
| CFT073                              | Wild-type pyelonephritis isolate (O6:K2:H1)                                          | 1                |
| $\Delta tosR$                       | CFT073 <i>tosR::kan</i>                                                              | 2                |
| $\Delta csgD$                       | CFT073 <i>csgD::kan</i>                                                              | This study       |
| $\Delta aufABCDEFGF$                | CFT073 <i>aufABCDEFGF::kan</i>                                                       | This study       |
|                                     |                                                                                      |                  |
| <b>Plasmid</b>                      | <b>Relevant characteristic(s)</b>                                                    | <b>Reference</b> |
| pBAD- <i>myc</i> -HisA              | Vector carrying arabinose inducible <i>araBAD</i> promoter, Amp <sup>r</sup>         | Invitrogen       |
| pBAD:: <i>aufABCDEFGF</i>           | <i>aufABCDEFGF</i> cloned into the NcoI and HindIII sites of pBAD- <i>myc</i> -HisA  | This study       |
| pBAD- <i>tosR</i> -His <sub>6</sub> | <i>tosR</i> cloned into NcoI and HindIII sites of pBAD- <i>myc</i> -HisA             | 2                |
| pKD4                                | Vector carrying a FRT-flanked <i>kan</i> gene (Amp <sup>r</sup> , Kan <sup>r</sup> ) | 3                |
| pKD46                               | Vector carrying phage $\lambda$ Red recombinase, Amp <sup>r</sup>                    | 3                |

<sup>a</sup>kan, kanamycin; amp, ampicillin; r, resistant.

1. Mobley HL, Green DM, Trifillis AL, Johnson DE, Chippendale GR, Lockett CV, Jones BD, Warren JW. 1990. Pyelonephritogenic *Escherichia coli* and killing of cultured human renal proximal tubular epithelial cells: role of hemolysin in some strains. *Infect Immun* 58:1281-1289.
2. Engstrom MD, Alteri CJ, Mobley HL. 2014. A conserved PapB family member, TosR, regulates expression of the uropathogenic *Escherichia coli* RTX nonfimbrial adhesin TosA while conserved LuxR family members TosE and TosF suppress motility. *Infect Immun* 82:3644-3656.
3. Datsenko KA, Wanner BL. 2000. One-step inactivation of chromosomal genes in *Escherichia coli* K-12 using PCR products. *Proc Natl Acad Sci U S A* 97:6640-6645.
