# Supplementary material for: TosR-Mediated Regulation of Adhesins and Biofilm Formation in Uropathogenic Escherichia coli
Source: PubMed Central journal article supplement (PMC5956150; doi:10.1128/msphere.00222-18), 2018-05-16
Supplement: sph003182550st4.pdf [file sph003182550st4.pdf]

**Table S4**

| <b>Primer</b> | <b>Purpose</b>                                                                                            | <b>Sequence (5'→3')</b>                                          |
|---------------|-----------------------------------------------------------------------------------------------------------|------------------------------------------------------------------|
| ΔaufKO_f      | Amplification of kanamycin cassette from pKD4 for λ Red recombineering with <i>aufABCDEFGF</i>            | GCTTGGATTTTTTAACAAAAGGAA<br>AGGTATAAATGGTGTAGGCTGGA<br>GCTGCTTC  |
| ΔaufKO_r      | Amplification of kanamycin cassette from pKD4 for λ Red recombineering with <i>aufABCDEFGF</i>            | TGCGCAGAAGCAGCCTAGTTTTCC<br>ACCAATCTGAAATGGGAATTAGCC<br>ATGGTCC  |
| ΔaufKO_f      | Amplification of kanamycin cassette from pKD4 for λ Red recombineering with <i>csgD</i>                   | TGTGCGATCAATAAAAAAAGCGG<br>GGTTTCATCATGGTGTAGGCTGGA<br>GCTGCTTC  |
| ΔcsgDKO_r     | Amplification of kanamycin cassette from pKD4 for λ Red recombineering with <i>csgD</i>                   | AACGTTTTCATGGCTTTATCGCCTGA<br>GGTTATCGTTATGGGAATTAGCCA<br>TGGTCC |
| auf_screen_f  | Screening for deletion of <i>auf</i> operon                                                               | AAGAACCTTCTGGAATTAGC                                             |
| auf_screen_r  | Screening for deletion of <i>auf</i> operon                                                               | AGCCAGTGCATTATAACGAC                                             |
| csgD_screen_f | Screening for deletion of <i>csgD</i>                                                                     | GCAACATCTGTCAGTACTTC                                             |
| csgD_screen_r | Screening for deletion of <i>csgD</i>                                                                     | GAAATTCTGCCGCCACAATC                                             |
| pBAD_screen_f | Screening for insertion into pBAD- <i>myc</i> -HisA                                                       | TGCCATAGCATTTTTATCC                                              |
| pBAD_screen_r | Screening for insertion into pBAD- <i>myc</i> -HisA                                                       | CTGATTTAATCTGTATCAGG                                             |
| pBAD_auf_f    | Amplification of <i>aufABCDEFGF</i> with 5' NcoI restriction site for cloning into pBAD- <i>myc</i> -HisA | NNNNCCATGGCCAAATTCAATTTA<br>TCTAATTTATCCGAC                      |
| pBAD_auf_r    | Amplification of <i>aufABCDEFGF</i> with 5' KpnI restriction site for cloning into pBAD- <i>myc</i> -HisA | NNNNGGTACCCAGGTAAAGTCAG<br>AAAAGTAAC                             |
| gapA_f        | qPCR                                                                                                      | CGTTAAAGGCGCTAACTTCG                                             |
| gapA_r        | qPCR                                                                                                      | ACGGTGGTCATCAGACCTTC                                             |
| papA1_f       | qPCR                                                                                                      | ATTTGATGGTGCGACAGCAACAGG                                         |
| papA1_r       | qPCR                                                                                                      | TCTGTTACAGGGTTGCCACTACCA                                         |
| papA2_f       | qPCR                                                                                                      | CGGGTGAAATTTGATGGAGCCACT                                         |
| papA2_r       | qPCR                                                                                                      | AGGCACCTTCAGCTACATTCTTGC                                         |
| aufA_f        | qPCR                                                                                                      | GAATCGGTTGCGACCTTACA                                             |
| aufA_r        | qPCR                                                                                                      | CAGGCTCACTGATATGGATGAC                                           |
